# Supplementary material
Source: PubMed Central journal article supplement (PMC9794017)
Supplement: NIHMS1855510-supplement-mrm29399-sup-0001-Supino_pdf.pdf [file NIHMS1855510-supplement-mrm29399-sup-0001-Supino_pdf.pdf]

# Improving Multiparametric MR - TRUS Guided Fusion Prostate Biopsies with Hyperpolarized $^{13}\text{C}$ Pyruvate Metabolic Imaging : A Technical Development Study

## Supporting Information

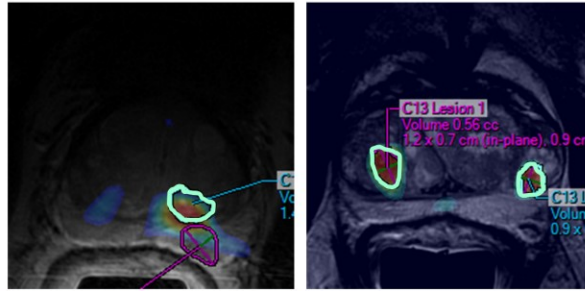

| Patient #                                                      | Patient 4                       | Patient 5                              |
|----------------------------------------------------------------|---------------------------------|----------------------------------------|
| PSA                                                            | 1.3                             | 17                                     |
| UCSF CAPRA Score                                               | 2                               | 1                                      |
| Risk Group                                                     | Low                             | Low                                    |
| # of $^{13}\text{C}$ Targets                                   | 1                               | 2                                      |
| $k_{pL}$ at $^{13}\text{C}$ Target( $s^{-1}$ )                 | 0.0410<br>( $\sigma = 0.0012$ ) | 0.0279/0.0312<br>( $\sigma = 0.0019$ ) |
| # of (+) cores/total cores in targeted + systematic biopsy     | 8/23                            | 3/19                                   |
| Overall Grade                                                  | 3+3                             | 3+3                                    |
| # of (+) $^{13}\text{C}$ cores/<br>total $^{13}\text{C}$ cores | 2/2                             | 2/3 (left),<br>See below(right)        |
| $^{13}\text{C}$ Core Grade                                     | 3+3                             | 3+3 (left),<br>ASAP/HGPIN(right)       |

**Supporting Information Table S1.** Summary of the clinical characteristics and biopsy findings from Patient 4 and 5.

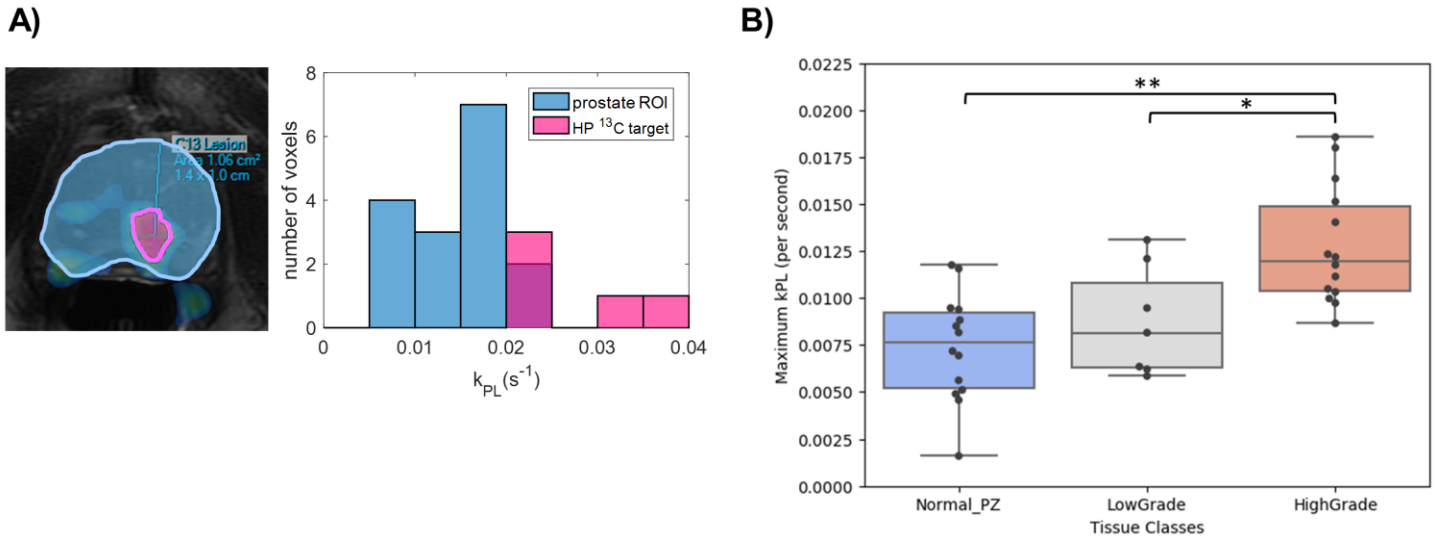

**Supporting Information Figure S1. A)** An example case showing the comparison of  $k_{\text{PL}}$  in the  $^{13}\text{C}$  targeted lesion versus segmented prostate outside of the lesion. Pathological diagnosis of the biopsy tissue was Gleason 3+3 tumor with 16% involvement. **B)**  $k_{\text{PL}}$  dichotomy between pathologist-defined low-grade prostate cancer (PCa) (Gleason  $\leq 3+4$ ), and high-grade prostate cancer (Gleason score  $\geq 4+3$ ). \* $p = 0.034$ ; \*\* $p = 0.0003$ . The recommended  $k_{\text{PL}}$  threshold =  $0.02(\text{s}^{-1})$  used in our study was corrected for the different MR sequence echo times between the EPSI acquisition in the cited reference versus the EPI in our study [24]. Figure reproduced with permission [17].
